# Supplementary material for: Laser, Intense Pulsed Light, and Radiofrequency for the Treatment of Burn Scarring: A Systematic Review and Meta-Analysis
Source: Eur Burn J. 2023 Mar 23;4(2):142–62. doi: 10.3390/ebj4020013 (PMC11571841; doi:10.3390/ebj4020013)
Supplement: Supplementary file 1 [file ebj-04-00013-s001.zip › Figure S1.pdf]

Figure S1

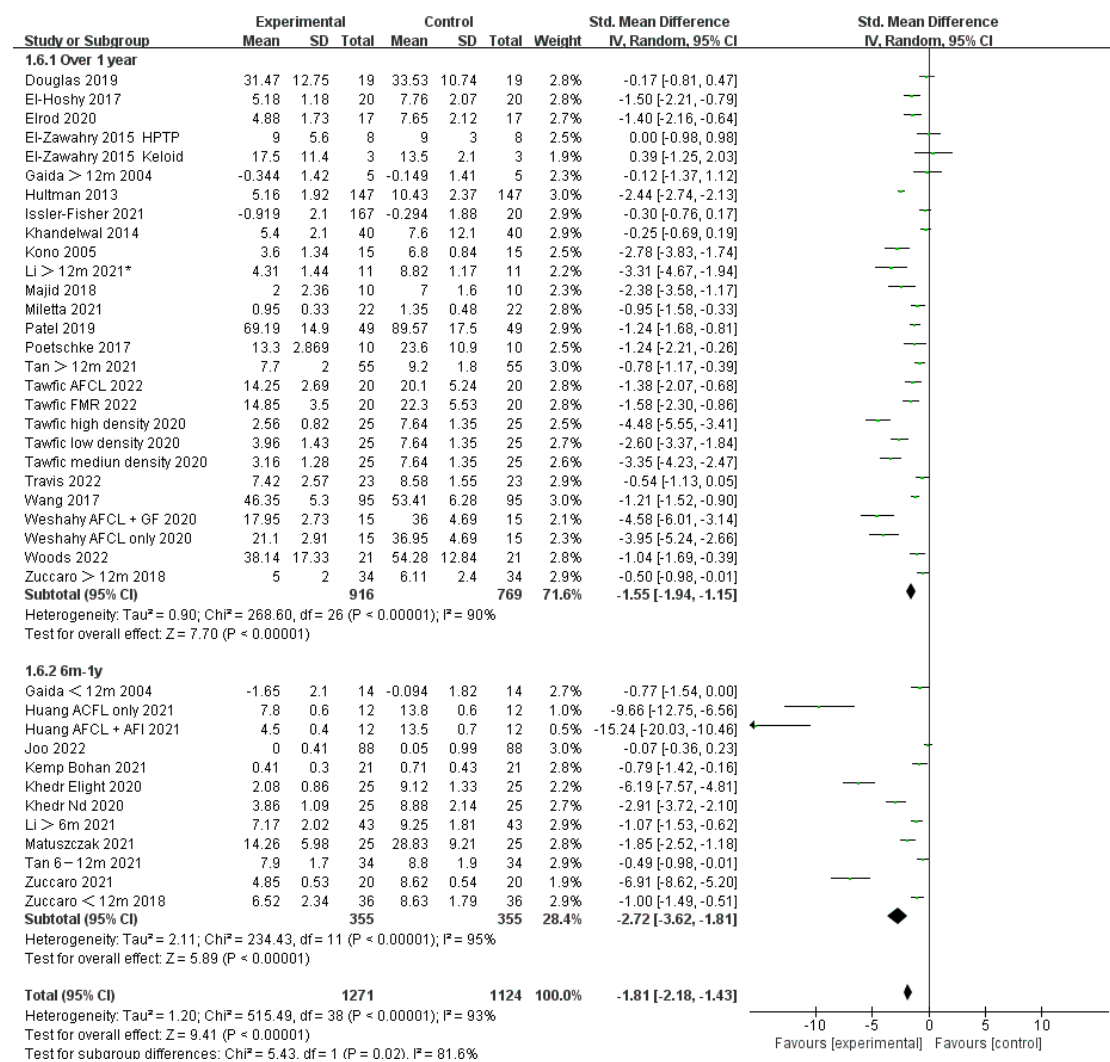

**Figure S1.** Forest plot showing the effects of photo-electric therapy for burn scars with different scar durations according to VSS, POSAS, thickness, and VAS for the group with scar.
